# Supplementary material
Source: PubMed Central journal article supplement (PMC5996992)
Supplement: NIHMS663256-supplement-Supplemental_material.pdf [file NIHMS663256-supplement-Supplemental_material.pdf]

### Supplemental Material

**Supplemental Table.** Detailed Information on Results of Standard Care in Subjects Who were Determined to have ACS with normal rCTP (score=0) and Non-Obstructive CAD on CCTA

| Subject           | CCTA Finding of Non-obstructive Plaque | Baseline ECG                    | Troponin                     | Stress Nuclear Perfusion Imaging                          | Coronary Angiography Intervention           | Clinical Outcome |
|-------------------|----------------------------------------|---------------------------------|------------------------------|-----------------------------------------------------------|---------------------------------------------|------------------|
| 72-year-old man   | Mid-RCA                                | Non-specific T-wave changes     | Negative                     | Apical area of ischemia, hypokinesis inferolateral region | None                                        | Unstable Angina  |
| 53-year-old man   | LM and distal LAD                      | Non-specific T-wave changes     | 2 <sup>nd</sup> set positive | None                                                      | 40% D2 ostium, 70% D3 ostium stenosis/ none | NSTEMI           |
| 59-year-old woman | OM1                                    | <1mm ST-segment elevation V2-V6 | Negative                     | None                                                      | 80% PDA stenosis/stent PDA                  | Unstable Angina  |

D2=second diagonal branch; D3= third diagonal branch; NSTEMI= Non-ST segment myocardial infarction; PDA=posterior descending artery
